# Supplementary material for: Helium Bubbles and Blistering in a Nanolayered Metal/Hydride Composite
Source: MDPI journal article supplement (doi:10.3390/ma14185393), 2021-09-18
Supplement: s1 [file s1]

## Article

# Helium Bubbles and Blistering in a Nanolayered Metal/Hydride Composite

Caitlin A. Taylor <sup>1,2</sup>, Eric Lang <sup>3</sup>, Paul G. Kotula <sup>3</sup>, Ronald Goeke <sup>2</sup>, Clark S. Snow <sup>2</sup>, Yongqiang Wang <sup>1</sup> and Khalid Hattar <sup>3,\*</sup>

<sup>1</sup> Materials Science and Technology Division, Los Alamos National Laboratory, Los Alamos, NM 87545, USA; caitlin@lanl.gov (C.A.T.); yqwang@lanl.gov (Y.W.)

<sup>2</sup> Component Science, Engineering, and Production Center, Sandia National Laboratories, Albuquerque, NM 87185, USA; rsgoeke@sandia.gov (R.G.K.); cssnow@sandia.gov (C.S.S.)

<sup>3</sup> Material, Physical, and Chemical Sciences Center, Sandia National Laboratories, Albuquerque, NM 87185, USA; ejlang@sandia.gov (E.L.); pgkotul@sandia.gov (P.G.K.); khattar@sandia.gov (K.H.)

\* Correspondence: khattar@sandia.gov

**Citation:** Taylor, C.A.; Lang, E.; Kotula, P.G.; Goeke, R.; Snow, C.; Wang, Y. Helium Bubbles and Blistering in a Nanolayered Metal/Hydride Composite. *Materials* **2021**, *14*, 5393. <https://doi.org/10.3390/ma14185393>

Received: 19 August 2021

Accepted: 13 September 2021

Published: 18 September 2021

**Publisher's Note:** MDPI stays neutral with regard to jurisdictional claims in published maps and institutional affiliations.

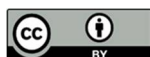

**Copyright:** © 2021 by the authors. Submitted for possible open access publication under the terms and conditions of the Creative Commons Attribution (CC BY) license (<https://creativecommons.org/licenses/by/4.0/>).

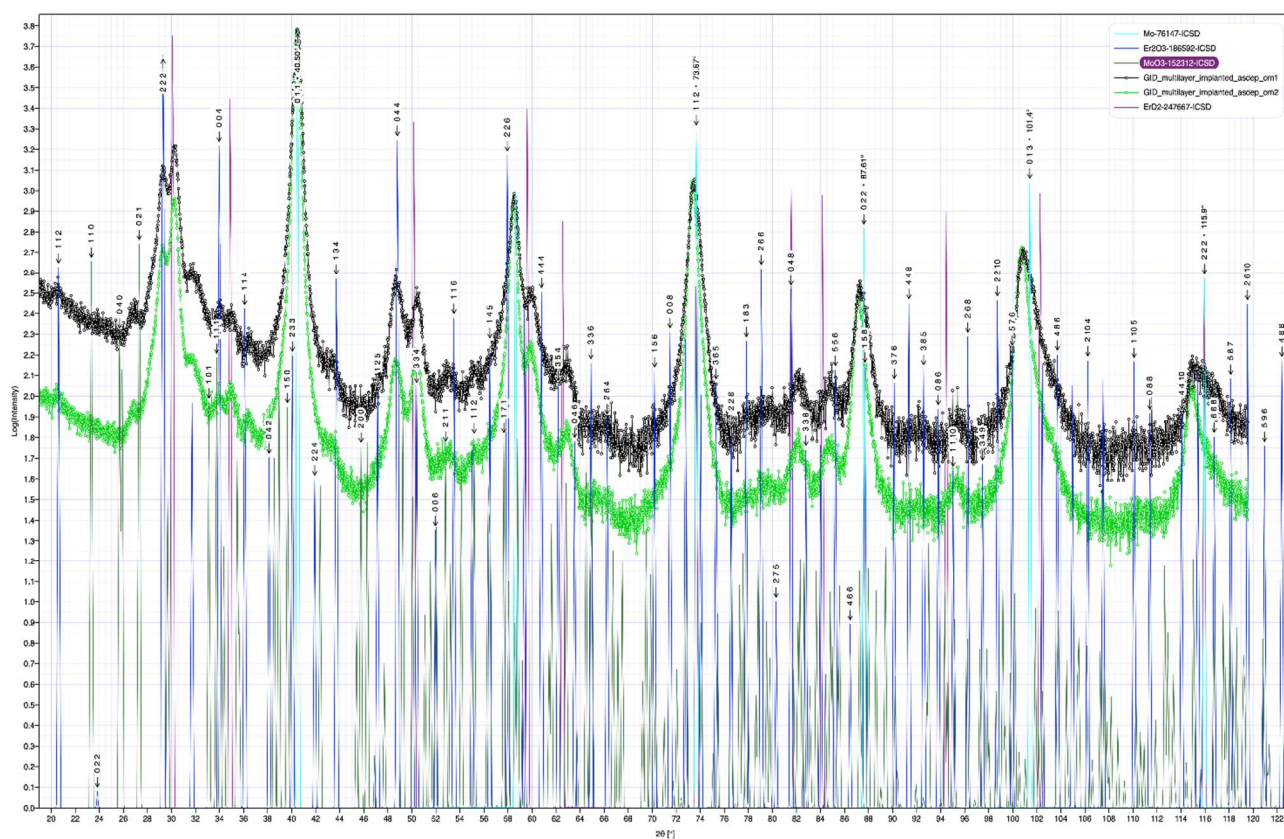

**Figure S1.** Grazing-incidence XRD showing the presence of oxide in the multilayered films after hydriding.
